# Supplementary material
Source: PubMed Central journal article supplement (PMC4273976)

**Supplementary Table 1. Data collection and refinement statistics**

|                                             | APY-EphA4                   | APY- $\beta$ Ala8.am-EphA4  |
|---------------------------------------------|-----------------------------|-----------------------------|
| <b>Crystal</b>                              |                             |                             |
| Space group                                 | P2 <sub>1</sub>             | P2 <sub>1</sub>             |
| Cell dimensions                             |                             |                             |
| a, b, c (Å)                                 | 36.27, 127.7, 84.57         | 37.22, 127.2, 84.6          |
| $\alpha$ , $\beta$ , $\gamma$ (°)           | 90, 90, 90                  | 90, 90, 90                  |
| <b>Data processing statistics</b>           |                             |                             |
| Resolution (Å)                              | 50.95-2.42 (2.52-2.42)      | 50.83-2.41 (2.51-2.41)      |
| R <sub>merge</sub>                          | 0.073 (0.219)               | 0.061 (0.207)               |
| Reflections                                 | 179142 (18172)              | 99518 (27979)               |
| Unique reflections                          | 27280 (2882)                | 9181 (27766)                |
| I/ $\sigma$ I                               | 14.4 (4.9)                  | 13.1 (4.8)                  |
| CC1/2                                       | 0.995 (0.971)               | 0.996 (0.935)               |
| Completeness (%)                            | 93.4 (90.1)                 | 92.3 (80.6)                 |
| Redundancy                                  | 6.6 (6.3)                   | 3.6 (3.3)                   |
| <b>Model</b>                                |                             |                             |
| Peptide-EphA4 complexes per asymmetric unit | 4                           | 4                           |
| No. atoms                                   |                             |                             |
| Peptide/EphA4                               | 388/5703                    | 392/5670                    |
| Water                                       | 176                         | 150                         |
| Other solvent                               | 60                          | 140                         |
| <b>Refinement statistics</b>                |                             |                             |
| Resolution (Å)                              | 50.95-2.42 (2.48-2.42)      | 40.14-2.41 (2.47-2.41)      |
| Reflections                                 | 27253 (1860)                | 27951 (1778)                |
| R <sub>work</sub> /R <sub>free</sub>        | 0.1706/0.2325 (0.301/0.423) | 0.1733/0.2406 (0.199/0.252) |
| R.m.s deviations                            |                             |                             |
| Bond lengths (Å)                            | 0.011                       | 0.01                        |
| Bond angles (°)                             | 1.468                       | 1.419                       |
| Ramachandran*                               |                             |                             |
| favored (%)                                 | 91.8                        | 92.5                        |
| allowed (%)                                 | 7.9                         | 6.9                         |
| MolProbity Score/Percentile*                | 2.25/84th                   | 1.86/96th                   |

\*The  $\beta$ Ala residue was omitted from the analysis.

**Supplementary Table 2. Phage display libraries**

| <b>Name</b> | <b>Sequence</b>                                                    |
|-------------|--------------------------------------------------------------------|
| APY peptide | APYCVYRGSWSC                                                       |
| Library 1   | APXCVXRGWSWC                                                       |
| Library 2   | APYCX <sup>Y</sup> X <sup>G</sup> XXXXC<br>F F<br>W<br>L<br>C<br>Q |
| Library 3   | APYCVYXGXWXC                                                       |
| Library 4   | XXXCVYRGSWSC                                                       |

**Supplementary Table 3. Sequences from non-panned phage clones**

| # of clones      | Peptide sequence    | DNA sequence |            |            |            |            |            |            |            |            |            |            |             | EphA4 binding |
|------------------|---------------------|--------------|------------|------------|------------|------------|------------|------------|------------|------------|------------|------------|-------------|---------------|
| <b>library 1</b> | <b>APXCVRGSWSC</b>  | <b>GCT</b>   | <b>CCG</b> | <b>NNK</b> | <b>TGT</b> | <b>GTG</b> | <b>NNK</b> | <b>AGG</b> | <b>GGT</b> | <b>TCT</b> | <b>TGG</b> | <b>TCG</b> | <b>TGT*</b> |               |
| 1                | APYCVWRGSWSC        | GCT          | CCG        | TAT        | TGT        | GTG        | TGG        | AGG        | GGT        | TCT        | TGG        | TCG        | TGT         | +             |
| 1                | APACVLRGSWSC        | GCT          | CCG        | GCG        | TGT        | GTG        | TTG        | AGG        | GGT        | TCT        | TGG        | TCG        | TGT         | -             |
| 1                | APACVVRGSWSC        | GCT          | CCG        | GCG        | TGT        | GTG        | GTG        | AGG        | GGT        | TCT        | TGG        | TCG        | TCT         | -             |
| 1                | APCCVERGSWSC        | GCT          | CCG        | TGT        | TGT        | GTG        | GAG        | AGG        | GGT        | TCT        | TGG        | TCG        | TCT         | -             |
| 1                | APCCVGRGSWSC        | GCT          | CCG        | TGT        | TGT        | GTG        | GGT        | AGG        | GGT        | TCT        | TGG        | TCG        | TGT         | -             |
| 1                | APDCVQRGSWSC**      | GCT          | CCG        | GAT        | TGT        | GTG        | TAG        | AGG        | GGT        | TCT        | TGG        | TCG        | TGT         | -             |
| 1                | APDCVVRGSWSC        | GCT          | CCG        | GAT        | TGT        | GTG        | GTG        | AGG        | GGT        | TCT        | TGG        | TCG        | TGT         | -             |
| 1                | APECVARGSWSC        | GCT          | CCG        | GAG        | TGT        | GTG        | GCT        | AGG        | GGT        | TCT        | TGG        | TCG        | TGT         | -             |
| 1                | APGCVDRGSWSC        | GCT          | CCG        | GGT        | TGT        | GTG        | GAT        | AGG        | GGT        | TCT        | TGG        | TCG        | TGT         | -             |
| 1                | APGCVVRGSWSC        | GCT          | CCG        | GGG        | TGT        | GTG        | GTT        | AGG        | GGT        | TCT        | TGG        | TCG        | TGT         | -             |
| 1                | APICVMRGSWSC        | GCT          | CCG        | ATT        | TGT        | GTG        | ATG        | AGG        | GGT        | TCT        | TGG        | TCG        | TCT         | -             |
| 1                | APICVTRGSWSC        | GCT          | CCG        | ATT        | TGT        | GTG        | ACT        | AGG        | GGT        | TCT        | TGG        | TCG        | TGT         | -             |
| 1                | APKCVDRGSWSC        | GCT          | CCG        | AAG        | TGT        | GTG        | GAT        | AGG        | GGT        | TCT        | TGG        | TCG        | TCT         | -             |
| 1                | APLCVERGSWSC        | GCT          | CCG        | CTT        | TGT        | GTG        | GAG        | AGG        | GGT        | TCT        | TGG        | TCG        | TGT         | -             |
| 1                | APLCVPRGSWSC        | GCT          | CCG        | CTG        | TGT        | GTG        | CCT        | AGG        | GGT        | TCT        | TGG        | TCG        | TGT         | -             |
| 1                | APLCVSRGSWSC        | GCT          | CCG        | CTT        | TGT        | GTG        | TCG        | AGG        | GGT        | TCT        | TGG        | TCG        | TCT         | -             |
| 1                | APMCVNRGSWSC        | GCT          | CCG        | ATG        | TGT        | GTG        | AAT        | AGG        | GGT        | TCT        | TGG        | TCG        | TGT         | -             |
| 1                | APNCVGRGSWSC        | GCT          | CCG        | AAT        | TGT        | GTG        | GGT        | AGG        | GGT        | TCT        | TGG        | TCG        | TGT         | -             |
| 1                | APNCVMRGSWSC        | GCT          | CCG        | AAT        | TGT        | GTG        | ATG        | AGG        | GGT        | TCT        | TGG        | TCG        | TCT         | -             |
| 1                | APPCVLRGSWSC        | GCT          | CCG        | CCG        | TGT        | GTG        | CTT        | AGG        | GGT        | TCT        | TGG        | TCG        | TGT         | -             |
| 1                | APPCVSRGSWSC        | GCT          | CCG        | CCT        | TGT        | GTG        | TCT        | AGG        | GGT        | TCT        | TGG        | TCG        | TGT         | -             |
| 1                | APSCVDRGSWSC        | GCT          | CCG        | TCG        | TGT        | GTG        | GAT        | AGG        | GGT        | TCT        | TGG        | TCG        | TGT         | -             |
| 1                | APSCVPRGSWSC        | GCT          | CCG        | AGT        | TGT        | GTG        | CCT        | AGG        | GGT        | TCT        | TGG        | TCG        | TGT         | -             |
| 1                | APTCVSRGSWSC        | GCT          | CCG        | ACG        | TGT        | GTG        | TCG        | AGG        | GGT        | TCT        | TGG        | TCG        | TGT         | -             |
| 1                | APTCVTRGSWSC        | GCT          | CCG        | ACT        | TGT        | GTG        | ACT        | AGG        | GGT        | TCT        | TGG        | TCG        | TGT         | -             |
| 1                | APVCVQRGSWSC        | GCT          | CCG        | GTG        | TGT        | GTG        | CAG        | AGG        | GGT        | TCT        | TGG        | TCG        | TGT         | -             |
| 1                | APVCVSRGSWSC        | GCT          | CCG        | GTT        | TGT        | GTG        | AGT        | AGG        | GGT        | TCT        | TGG        | TCG        | TGT         | -             |
| 1                | APWCVIRGSWSC        | GCT          | CCG        | TGG        | TGT        | GTG        | ATT        | AGG        | GGT        | TCT        | TGG        | TCG        | TGT         | -             |
| 1                | APWCVQRGSWSC        | GCT          | CCG        | TGG        | TGT        | GTG        | CAG        | AGG        | GGT        | TCT        | TGG        | TCG        | TGT         | -             |
| 1                | APYCVPRGSWSC        | GCT          | CCG        | TAT        | TGT        | GTG        | CCT        | AGG        | GGT        | TCT        | TGG        | TCG        | TGT         | -             |
| 1                | APYCVWRGSWSC        | GCT          | CCG        | TAT        | TGT        | GTG        | TGG        | AGG        | GGT        | TCT        | TGG        | TCG        | TGT         | +             |
| <b>library 2</b> | <b>APYCXIXGXXXX</b> | <b>GCT</b>   | <b>CCG</b> | <b>TWT</b> | <b>TGT</b> | <b>NNK</b> | <b>TDK</b> | <b>NNK</b> | <b>GGT</b> | <b>NNK</b> | <b>NNK</b> | <b>NNK</b> | <b>TGT</b>  |               |
|                  | <b>F F</b>          |              |            |            |            |            |            |            |            |            |            |            |             |               |
|                  | <b>W</b>            |              |            |            |            |            |            |            |            |            |            |            |             |               |
|                  | <b>L</b>            |              |            |            |            |            |            |            |            |            |            |            |             |               |
|                  | <b>C</b>            |              |            |            |            |            |            |            |            |            |            |            |             |               |
|                  | <b>Q</b>            |              |            |            |            |            |            |            |            |            |            |            |             |               |
| 1                | APFCAWPGPTPC        | GCT          | CCG        | TTT        | TGT        | GCG        | TGG        | CCG        | GGT        | CCT        | ACT        | CCT        | TGT         | -             |
| 1                | APFCLYEGKALC        | GCT          | CCG        | TTT        | TGT        | CTT        | TAT        | GAG        | GGT        | AAG        | GCT        | CTT        | TGT         | -             |
| 1                | APFCPFGGNVQC        | GCT          | CCG        | TTT        | TGT        | CCT        | TTT        | GGT        | GGT        | AAT        | GTT        | CAG        | TGT         | -             |
| 1                | APFCPFKGDPLC        | GCT          | CCG        | TTT        | TGT        | CCG        | TTT        | AAG        | GGT        | GAT        | CCT        | CTT        | TGT         | -             |
| 1                | APFCSWHAQRC         | GCT          | CCG        | TTT        | TGT        | TCG        | TGG        | CAT        | GGT        | GCT        | CAG        | AGG        | TGT         | -             |
| 1                | APFCSYMGTPLC        | GCT          | CCG        | TTT        | TGT        | TCT        | TAT        | ATG        | GGT        | ACG        | CCT        | TTG        | TGT         | -             |
| 1                | APFCSYRGHHPC        | GCT          | CCG        | TTT        | TGT        | TCT        | TAT        | CGT        | GGT        | CAT        | CAT        | CCT        | TGT         | -             |
| 1                | APFCTYQGHLDL        | GCT          | CCG        | TTT        | TGT        | ACT        | TAT        | TAG        | GGT        | CAT        | CTT        | GAT        | TGT         | -             |

|   |              |     |     |     |     |     |     |     |     |     |     |     |     |   |
|---|--------------|-----|-----|-----|-----|-----|-----|-----|-----|-----|-----|-----|-----|---|
| 1 | APYCAWAGKVRC | GCT | CCG | TAT | TGT | GCT | TGG | GCT | GGT | AAG | GTT | AGG | TGT | - |
| 1 | APYCKFAGDTSC | GCT | CCG | TAT | TGT | AAG | TTT | GCG | GGT | GAT | ACT | TCT | TGT | - |
| 1 | APYCKLNGHKNC | GCT | CCG | TAT | TGT | AAG | TTG | AAT | GGT | CAT | AAG | AAT | TGT | - |
| 1 | APYCPQTGKYSC | GCT | CCG | TAT | TGT | CCT | TAG | ACT | GGT | AAG | TAT | TCT | TGT | - |
| 1 | APYCPYNGPVRC | GCT | CCG | TAT | TGT | CCG | TAT | AAT | GGT | CCG | GTG | CGT | TGT | - |
| 1 | APYCQLAGNIPC | GCT | CCG | TAT | TGT | CAG | TTG | GCT | GGT | AAT | ATT | CCG | TGT | - |
| 1 | APYCSFSGHDKC | GCT | CCG | TAT | TGT | AGT | TTT | AGT | GGT | CAT | GAT | AAG | TGT | - |
| 1 | APYCSLQGHYLC | GCT | CCG | TAT | TGT | TCT | TTG | CAG | GGT | CAT | TAT | CTT | TGT | - |
| 1 | APYCSYNGPHTC | GCT | CCG | TAT | TGT | TCT | TAT | AAT | GGT | CCT | CAT | ACT | TGT | - |
| 1 | APYCTQKGLNSC | GCT | CCG | TAT | TGT | ACT | TAG | AAG | GGT | CTT | AAT | AGT | TGT | - |
| 1 | APYCTWHGTRNC | GCT | CCG | TAT | TGT | ACT | TGG | CAT | GGT | ACT | CGT | AAT | TGT | - |
| 1 | APYCYLAGASPC | GCT | CCG | TAT | TGT | TAT | TTG | GCG | GGT | GCT | TCG | CCT | TGT | - |
| 1 | APYCYWNGAYTC | GCT | CCG | TAT | TGT | TAT | TGG | AAT | GGT | GCT | TAT | ACT | TGT | - |

|                  |                     |            |            |            |            |            |            |            |            |            |            |            |            |   |
|------------------|---------------------|------------|------------|------------|------------|------------|------------|------------|------------|------------|------------|------------|------------|---|
| <b>library 3</b> | <b>APYCVYXGXWXC</b> | <b>GCT</b> | <b>CCG</b> | <b>TAT</b> | <b>TGT</b> | <b>GTG</b> | <b>TAT</b> | <b>NNK</b> | <b>GGT</b> | <b>NNK</b> | <b>TGG</b> | <b>NNK</b> | <b>TGT</b> |   |
| 1                | APYCVYAGKWSC        | GCT        | CCG        | TAT        | TGT        | GTG        | TAT        | GCT        | GGT        | AAG        | TGG        | TCG        | TGT        | + |
| 1                | APYCVYEGLWNC        | GCT        | CCG        | TAT        | TGT        | GTG        | TAT        | GAG        | GGT        | CTG        | TGG        | AAT        | TGT        | + |
| 1                | APYCVYGGWTC         | GCT        | CCG        | TAT        | TGT        | GTG        | TAT        | GGG        | GGT        | TTG        | TGG        | ACG        | TGT        | + |
| 2                | APYCVYKGSWNC        | GCT        | CCG        | TAT        | TGT        | GTG        | TAT        | AAG        | GGT        | TCG        | TGG        | AAT        | TGT        | + |
| 1                | APYCVYQLWEC         | GCT        | CCG        | TAT        | TGT        | GTG        | TAT        | CAG        | GGT        | TTG        | TGG        | GAG        | TGT        | + |
| 1                | APYCVYRGHWGC        | GCT        | CCG        | TAT        | TGT        | GTG        | TAT        | CGG        | GGT        | CAT        | TGG        | GGG        | TGT        | + |
| 1                | APYCVYAGHWPC        | GCT        | CCG        | TAT        | TGT        | GTG        | TAT        | GCG        | GGT        | CAT        | TGG        | CCG        | TGT        | - |
| 1                | APYCVYHGPWGC        | GCT        | CCG        | TAT        | TGT        | GTG        | TAT        | CAT        | GGT        | CCT        | TGG        | GGT        | TGT        | - |
| 1                | APYCVYPGDWAC        | GCT        | CCG        | TAT        | TGT        | GTG        | TAT        | CCG        | GGT        | GAT        | TGG        | GCT        | TGT        | - |
| 1                | APYCVYPGHWQC        | GCT        | CCG        | TAT        | TGT        | GTG        | TAT        | CCT        | GGT        | CAT        | TGG        | CAG        | TGT        | - |
| 1                | APYCVYQGAWGC        | GCT        | CCG        | TAT        | TGT        | GTG        | TAT        | CAG        | GGT        | GCT        | TGG        | GGT        | TGT        | - |
| 1                | APYCVYQGPWRC        | GCT        | CCG        | TAT        | TGT        | GTG        | TAT        | CAG        | GGT        | CCG        | TGG        | CGT        | TGT        | - |
| 1                | APYCVYTGAWPC        | GCT        | CCG        | TAT        | TGT        | GTG        | TAT        | ACT        | GGT        | GCT        | TGG        | CCG        | TGT        | - |
| 1                | APYCVYVGGWPC        | GCT        | CCG        | TAT        | TGT        | GTG        | TAT        | GTG        | GGT        | GGT        | TGG        | CCT        | TGT        | - |

|                  |                     |            |            |            |            |            |            |            |            |            |            |            |            |     |
|------------------|---------------------|------------|------------|------------|------------|------------|------------|------------|------------|------------|------------|------------|------------|-----|
| <b>library 4</b> | <b>XXXCVYRGSWSC</b> | <b>NNK</b> | <b>NNK</b> | <b>NNK</b> | <b>TGT</b> | <b>GTG</b> | <b>TAT</b> | <b>AGG</b> | <b>GGT</b> | <b>TCT</b> | <b>TGG</b> | <b>TCG</b> | <b>TGT</b> |     |
| 1                | ALSCVYRGSWSC        | GCT        | CTG        | TCT        | TGT        | GTG        | TAT        | AGG        | GGT        | TCT        | TGG        | TCG        | TGT        | -   |
| 1                | AVACVYRGSWSC        | GCG        | GTG        | GCG        | TGT        | GTG        | TAT        | AGG        | GGT        | TCT        | TGG        | TCG        | TGT        | -   |
| 1                | FPPCVYRGSWSC        | TTT        | CCT        | CCT        | TGT        | GTG        | TAT        | AGG        | GGT        | TCT        | TGG        | TCG        | TGT        | -   |
| 1                | GDWCVYRGSWSC        | GGT        | GAT        | TGG        | TGT        | GTG        | TAT        | AGG        | GGT        | TCT        | TGG        | TCG        | TGT        | -   |
| 1                | GNECVYRGSWSC        | GGT        | AAT        | GAG        | TGT        | GTG        | TAT        | AGG        | GGT        | TCT        | TGG        | TCG        | TGT        | -   |
| 1                | GYTCVYRGSWSC        | GGG        | TAT        | ACG        | TGT        | GTG        | TAT        | AGG        | GGT        | TCT        | TGG        | TCG        | TGT        | -   |
| 1                | HQACVYRGSWSC        | CAT        | CAG        | GCT        | TGT        | GTG        | TAT        | AGG        | GGT        | TCT        | TGG        | TCG        | TGT        | -/+ |
| 1                | LCACVYRGSWSC        | TTG        | TGT        | GCT        | TGT        | GTG        | TAT        | AGG        | GGT        | TCT        | TGG        | TCG        | TGT        | -   |
| 1                | LENCVYRGSWSC        | CTG        | GAG        | AAT        | TGT        | GTG        | TAT        | AGG        | GGT        | TCT        | TGG        | TCG        | TGT        | -   |
| 1                | LLSCVYRGSWSC        | TTG        | TTG        | AGC        | TGT        | GTG        | TAT        | AGG        | GGT        | TCT        | TGG        | TCG        | TGT        | -   |
| 1                | MSECVYRGSWSC        | ATG        | TCG        | GAG        | TGT        | GTG        | TAT        | AGG        | GGT        | TCT        | TGG        | TCG        | TGT        | -   |
| 1                | MVNCVYRGSWSC        | ATG        | GTG        | AAT        | TGT        | GTG        | TAT        | AGG        | GGT        | TCT        | TGG        | TCG        | TGT        | -   |
| 2                | NNHCVYRGSWSC        | AAT        | AAT        | CAT        | TGT        | GTG        | TAT        | AGG        | GGT        | TCT        | TGG        | TCG        | TGT        | -   |
| 1                | VDESCVYRGSWSC       | GTG        | GAT        | TCT        | TGT        | GTG        | TAT        | AGG        | GGT        | TCT        | TGG        | TCG        | TGT        | -   |

\*M = A/C; K = G/T; W = A/T; D = A/G/T; N = A/C/G/T

\*\*TAG = Q

Supplementary Figure 1

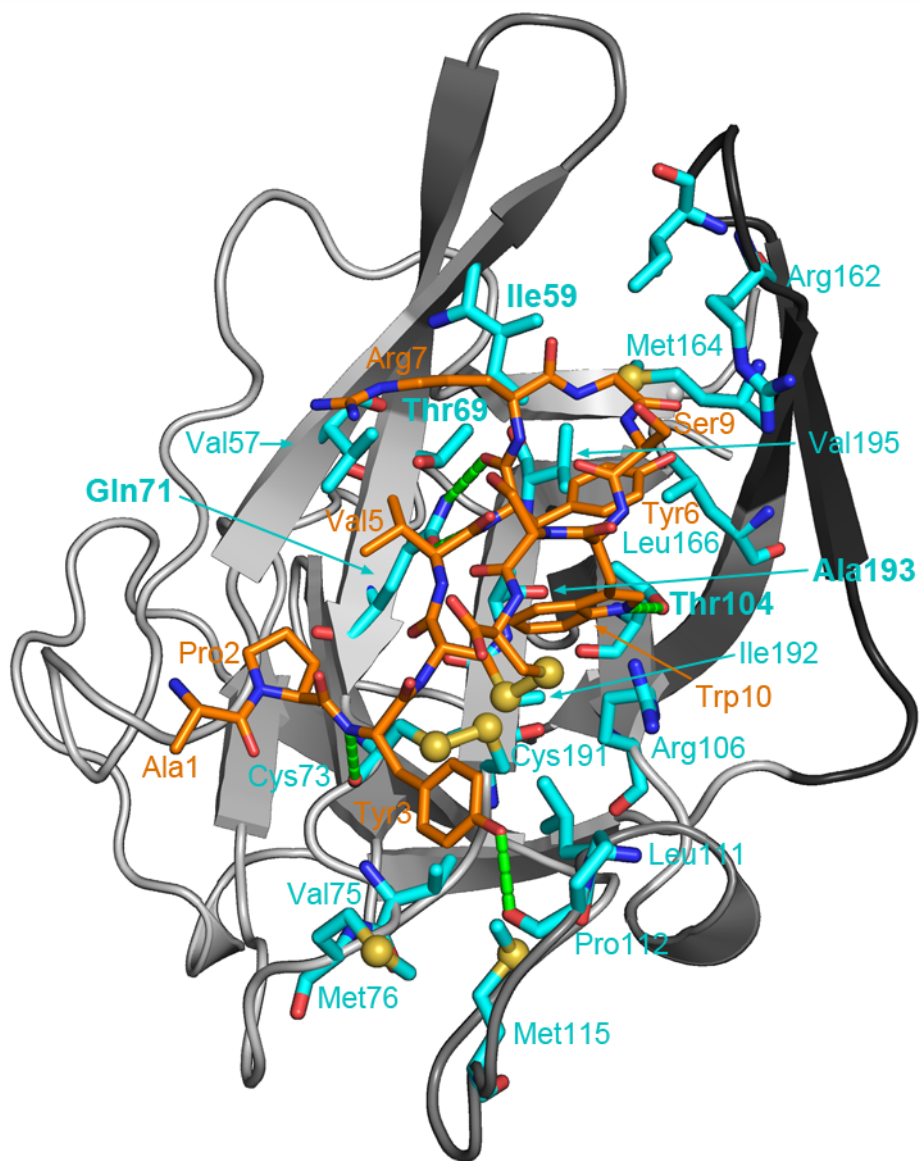

Supplementary Figure 2

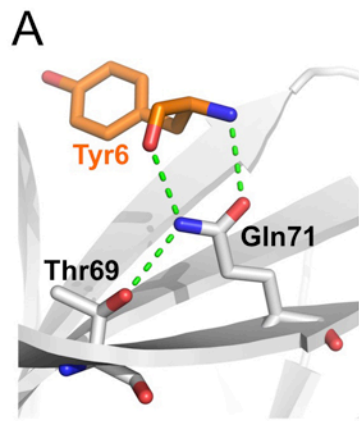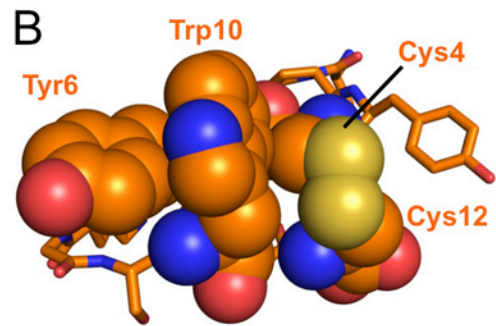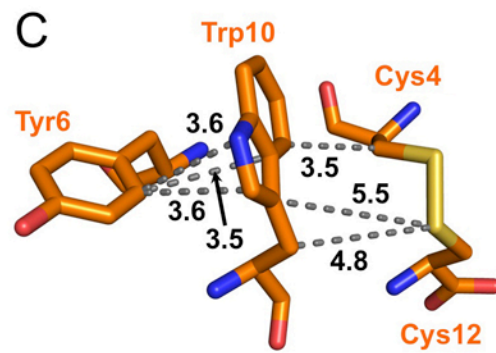

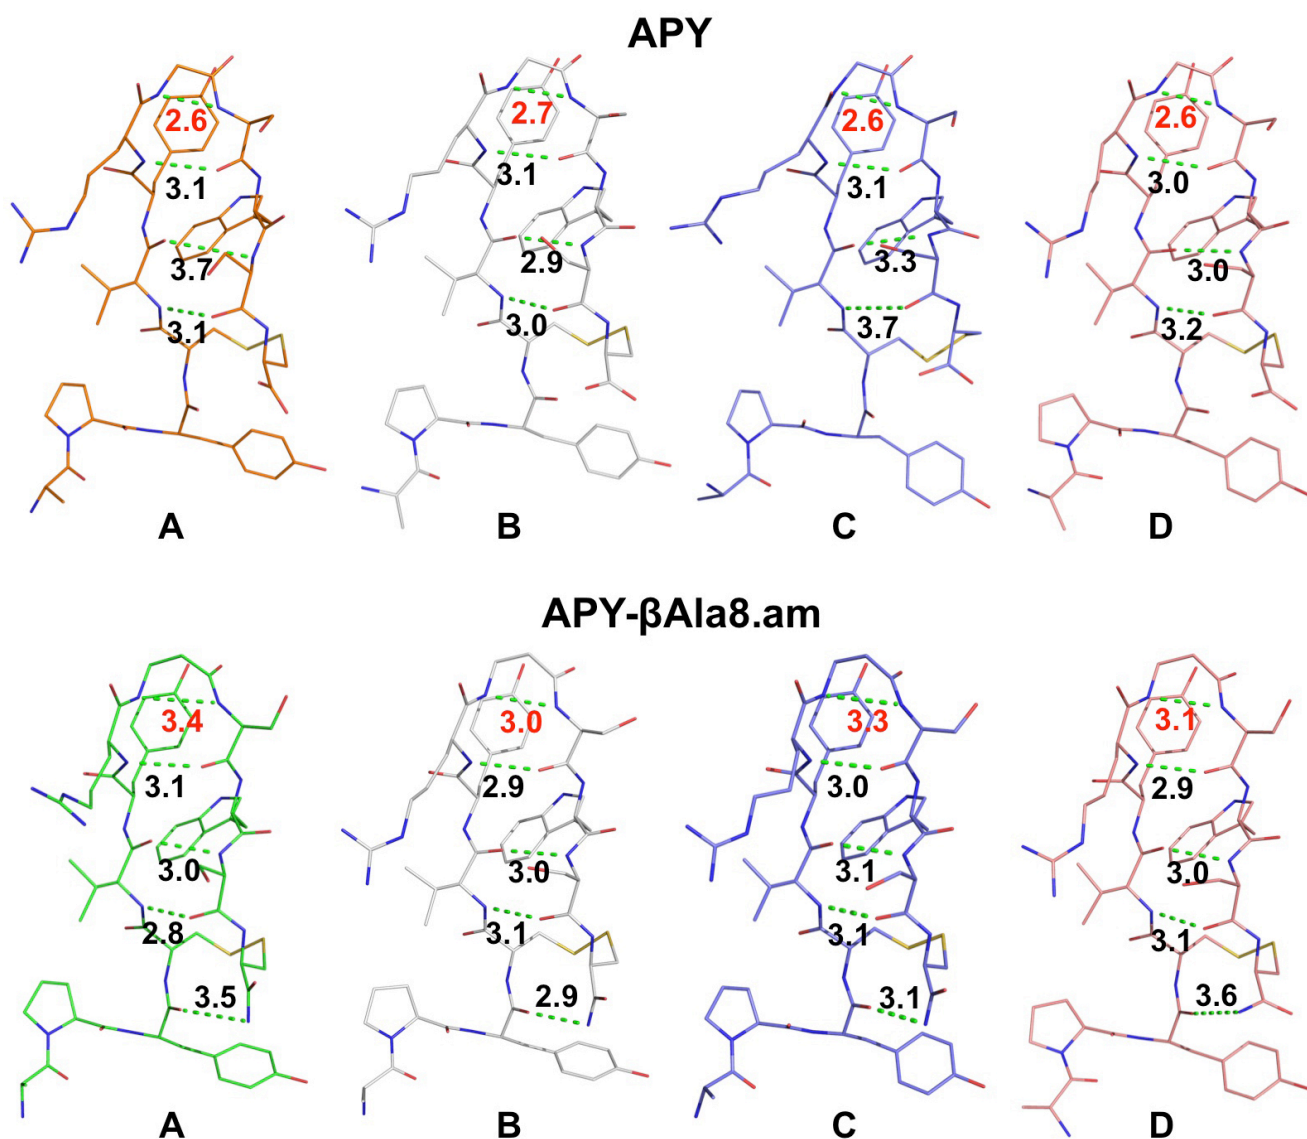

| Peptide hydrogen bond and $\beta$ -turn N-N distances (Å) |     |     |     |     |                      |     |     |     |
|-----------------------------------------------------------|-----|-----|-----|-----|----------------------|-----|-----|-----|
|                                                           | APY |     |     |     | APY- $\beta$ Ala8.am |     |     |     |
|                                                           | A   | B   | C   | D   | A                    | B   | C   | D   |
| <b>Gly8/<math>\beta</math>Ala8 N – Ser9 N</b>             | 2.6 | 2.7 | 2.6 | 2.6 | 3.4                  | 3   | 3.3 | 3.1 |
| <b>Arg7 N – Ser9 O</b>                                    | 3.1 | 3.1 | 3.1 | 3.0 | 3.1                  | 2.9 | 3.0 | 2.9 |
| <b>Val5 O – Ser11 N</b>                                   | 3.7 | 2.9 | 3.3 | 3.0 | 3.0                  | 3.0 | 3.1 | 3.0 |
| <b>Val5 N – Ser11 O</b>                                   | 3.1 | 3.0 | 3.7 | 3.2 | 2.8                  | 3.1 | 3.1 | 3.1 |
| <b>Tyr3 O – C-term N</b>                                  | --- | --- | --- | --- | 3.5                  | 2.9 | 3.1 | 3.6 |

Supplementary Figure 4

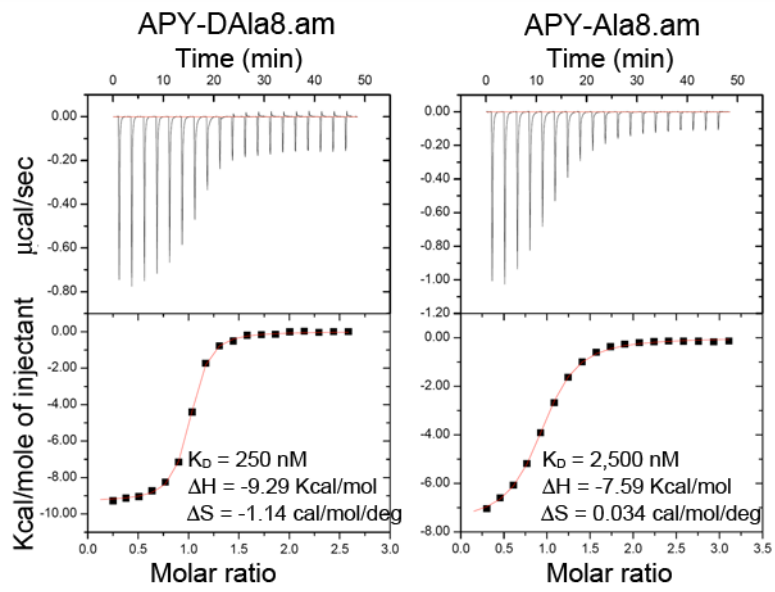

Supplement: cb500677x_si_002.pdf [file cb500677x_si_002.pdf]
